# Supplementary material
Source: PubMed Central journal article supplement (PMC10416083)

## Supplemental Online Content

Dummer R, Gyorki DE, Hynstrom JR, Ning M, Lawrence T, Ross MI. Final 5-year follow-up results evaluating neoadjuvant talimogene laherparepvec plus surgery in advanced melanoma: a randomized clinical trial. *JAMA Oncol*. Published online August 10, 2023. doi:10.1001/jamaoncol.2023.2789

### **eFigure.** Patient Flow Diagram

This supplemental material has been provided by the authors to give readers additional information about their work.

**eFigure.** Patient Flow Diagram

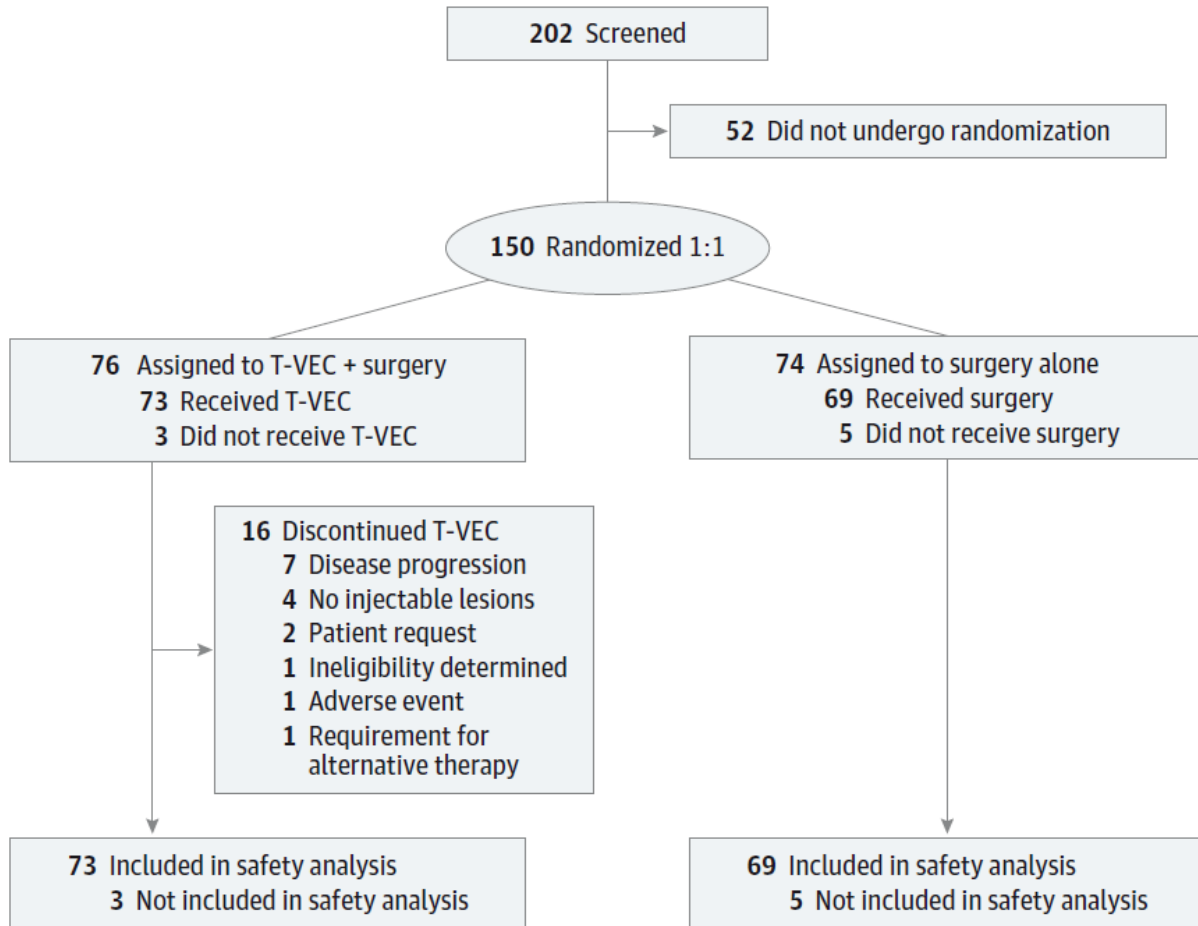

Supplement: jamaoncol-e232789-s002.pdf [file jamaoncol-e232789-s002.pdf]
