# Supplementary material
Source: PubMed Central journal article supplement (PMC10416083)
Supplement: jamaoncol-e232789-s003.pdf [file jamaoncol-e232789-s003.pdf]

## Data Sharing Statement

Dummer. Final 5-Year Follow-Up Results Evaluating Neoadjuvant Talimogene Laherparepvec Plus Surgery in Advanced Melanoma. *JAMA Oncol.* Published August 10, 2023.  
doi:10.1001/jamaoncol.2023.2789

### Data

**Data available:** Yes

**Data types:** Deidentified participant data, Data dictionary

**How to access data:** <https://www.amgen.com/science/clinical-trials/clinical-data-transparency-practices/clinical-trial-data-sharing-request>

**When available:** beginning date: 10-29-2023

### Supporting Documents

**Document types:** None

### Additional Information

**Who can access the data:** Qualified medical/scientific researchers requesting the data, researchers whose proposed use of the data has been approved

**Types of analyses:** n/a

**Mechanisms of data availability:** after approval of a proposal

**Any additional restrictions:** Following the approval of a data sharing request and the signing of the agreement, Amgen will de-identify patient-level data and anonymize documents in accordance with local legal and ethical regulations. The de-identified patient level data will be provided directly to the researcher in a secure manner, and the researcher is responsible for protecting the confidentiality and integrity of the data while the research is conducted.
